# Supplementary material
Source: Research Square preprint supplement (doi:10.21203/rs.3.rs-9870815/v1)
Supplement: Supplementary file 1 [file 4e796680c28fa2ea6b1cb5e4.docx]

**Supplementary Materials**

*Fig. S1: Sample groups.*


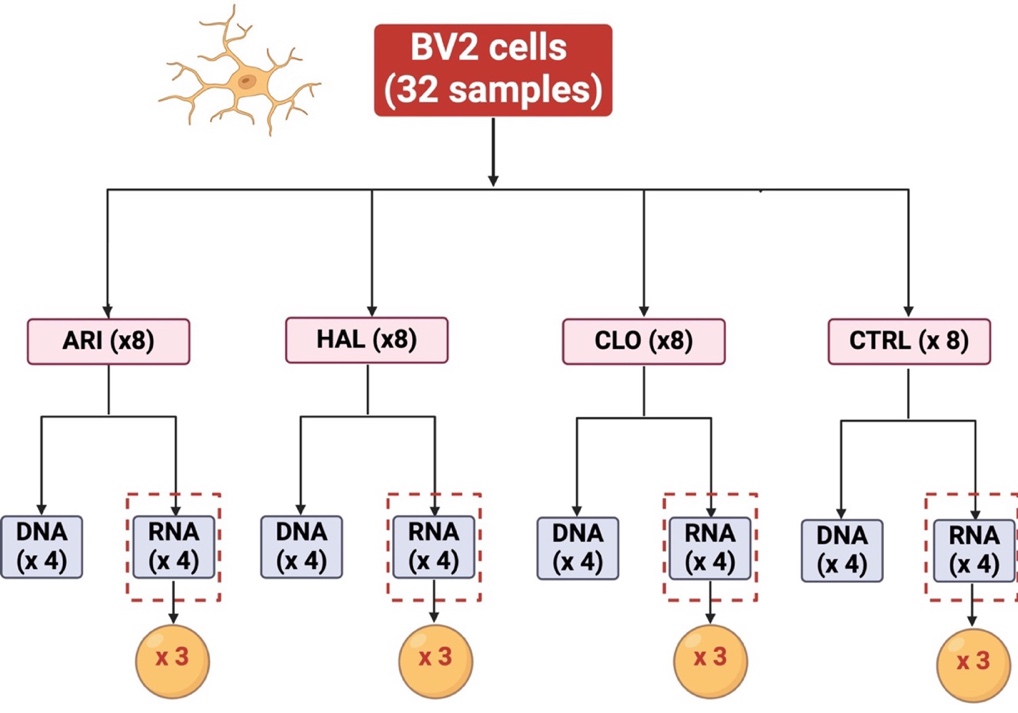


Abbreviations: ARI, aripiprazole; CLO, clozapine; CTRL, control; DNA, deoxyribonucleic acid; HAL, haloperidol; RNA, ribonucleic acid. Created with Biorender.com.

Table S1: RNA quality control summary: concentration and integrity number.

| **Sample Name** | **Concentration (ng/µL)** | **Volume (µL)** | **Total amount (µg)** | **RIN** |
| --- | --- | --- | --- | --- |
| CTRL_1 | 294.0 ng/µL | 7 µL | 2.058 µg | 8.4 |
| CTRL_2 | 572.0 ng/µL | 7 µL | 4.004 µg | 9.3 |
| CTRL_3 | 629.0 ng/µL | 7 µL | 4.403 µg | 9.5 |
| HAL_1 | 748.0 ng/µL | 7 µL | 5.236 µg | 9.7 |
| HAL_2 | 1012.0 ng/µL | 7 µL | 7.084 µg | 9.7 |
| HAL_3 | 1052.0 ng/µL | 7 µL | 7.364 µg | 9.6 |
| CLO_1 | 513.0 ng/µL | 7 µL | 3.591 µg | 7.3 |
| CLO_2 | 1101.0 ng/µL | 7 µL | 7.707 µg | 9.3 |
| CLO_3 | 1139.0 ng/µL | 7 µL | 7.973 µg | 9.1 |
| ARI_1 | 973.0 ng/µL | 7 µL | 6.811 µg | 9.1 |
| ARI_2 | 927.0 ng/µL | 7 µL | 6.489 µg | 9.1 |
| ARI_3 | 936.0 ng/µL | 7 µL | 6.552 µg | 9.1 |

Abbreviations: ARI, aripiprazole; CLO, clozapine; CTRL, control; HAL, haloperidol; RIN, RNA integrity number.

Fig. S2: Sample clustering via multidimensional scaling (left) and gene expression distribution (right).

**
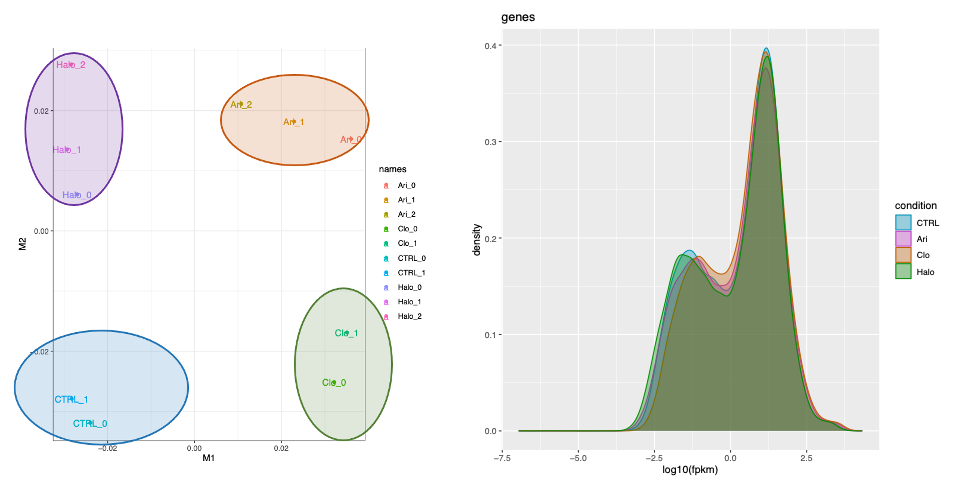
**

Abbreviations: ARI (aripiprazole); CLO (clozapine); CTRL (control); fpkm (fragments per kilobase of transcript per million mapped reads); HALO (haloperidol).

Fig. S3:Jansen-Shannon distance matrix


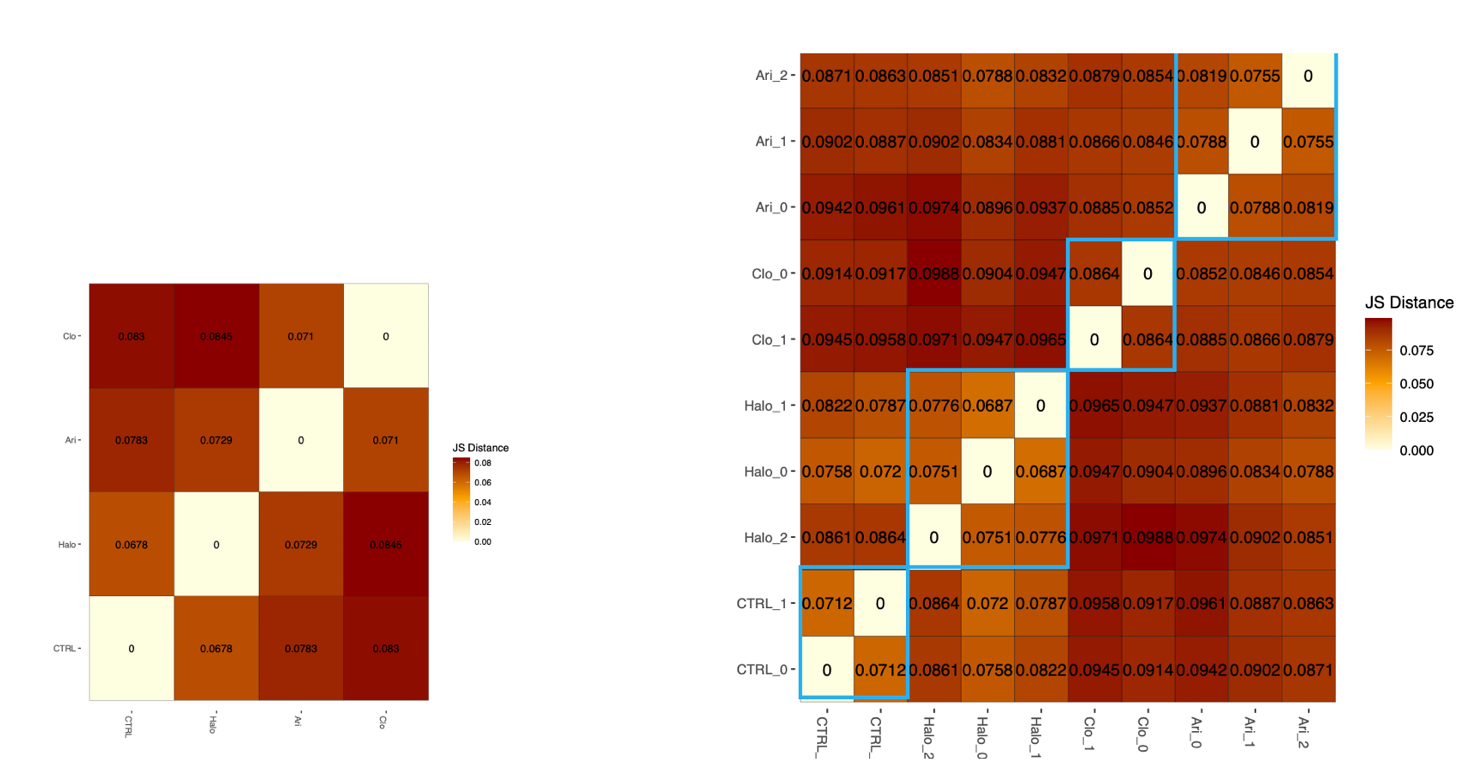


Abbreviations: ARI (aripiprazole); CLO (clozapine); CTRL (control); HALO (haloperidol); JS (Jansen-Shannon).

Table S2: Pathway enrichment analysis of differentially expressed genes in BV2 microglial cells following subchronic exposure to aripiprazole versus vehicle.

| **GENE FUNCTIONS** | **DEGS** | **FDR** | **ENRICHMENT RATIO** | **EXPRESSION** |
| --- | --- | --- | --- | --- |
| **Response to oxygen levels** | *Cflar; Ptgs2; Foxo3; Ddit4; Apaf1; Mdm2; Alkbh5; Nos2; Stc2; Brip1; Hif1a; Tert; Ero1l; Rgcc; Ep300; Ndrg1; Fam162a; Vegfa; Pdk1; Foxo1; Arnt; Slc2a1; Fosl2; Rbpj; Rest; Nos1; Tbl2; Ppargc1a; Flt1; Hilpda; Itpr1; Hk2; Adm; Hif3a; Bnip3; Adam8; F7; Hmox1; Egln1; Mmp12; Rora; Cbl; Atm; Pgk1; Cybb* | 8,00×10⁻⁸*** | 2,910 | **↓** |
| **Covalent chromatin modification** | *Elk4; Zfp451; Trip12; Jmjd1c; Eya4; Hmga2; Lif; Jade2; Kdm6b; Prkca; Hist1h1d; Tert; Ep300; Lrrk2; Bcl6; Dtx3l; Hlcs; Phf10; Vegfa; Pcgf5; Kdm2a; Rif1; Eid1; Dnmt3b; Jade1; Setd7; Padi2; Chd5; Prkaa2; Rlf; Rest; Pcgf3; Nos1; Clock; Kdm5a; Kdm7a; Kdm3a; Arrb1; Msl2; Setd2; Chek1; Atm; Kdm6a; Taf1; Phf8* | 6,00×10⁻⁴*** | 2,118 | **↓** |
| **Production of mediator of immune response** | *Il1r1; Il18rap; Dennd1b; Fzd5; Tnfaip3; Arg1; Hk1; Nlrp3; Rsad2; Il7r; Dlg1; Polq; Bcl6; Spink5; Cd74; Rif1; Traf6; Il1b; Ddx58; Tnfrsf1b; Il6; Swap70; Tnfsf13b; Hmox1; Lig4; Atm* | 6,00×10⁻⁴*** | 2,768 | **↓** |
| **Positive regulation of catabolic process** | *Rc3h1; Epm2a; Gja1; Tnfaip3; Mdm2; Smcr8; Hif1a; Entpd5; Dapk1; Socs4; Trib1; Lrrk2; Rnf19a; Ago2; Ptk2; Clec16a; Cblb; Dtx3l; Crebrf; Csnk1a1; Dab2ip; Il1b; Foxo1; Tiparp; Faf1; Prkaa2; Tnfrsf1b; Hk2; Plk1; Trim30a; Bnip3; Adam8; Hmox1; Irs2; Cnot1; Vps13c; Atm; Arih1; Pim2; Taf1; Mid2* | 6,00×10⁻⁴*** | 2,155 | **↓** |
| **Regulation of DNA-binding transcription factor activity** | *Il18rap; Cflar; Tnfaip3; Hmga2; Nlrp3; Trim25; Csf3; Med13; Stat3; Ptch1; Jmy; Acod1; Rgcc; Trib1; Ep300; Map3k13; Vegfa; Nlrc4; Dab2ip; Traf6; Il1b; Faf1; Id3; Ddx58; Il6; Ppargc1a; Tlr6; Clock; Bhlhe40; Fancd2; Kdm5a; Arrb1; Adam8; Hmox1; Egln1; Taf1; Mid2; Flna* | 1,30×10⁻³** | 2,121 | **↓** |
| **Angiogenesis** | *Ptgs2; Fzd5; Hmga2; Lif; Ccl5; Stat3; Pecam1; Prkca; Hif1a; Pik3cg; Tert; Rgcc; Nr4a1; Ago2; Ptk2; Adamts1; Vegfa; Dab2ip; Mmp9; Calcrl; Il1b; Vav3; F3; Rbm15; Hgf; Rbpj; Cxcl10; Flt1; C1galt1; Hk2; Adm; Hif3a; Pik3c2a; Adam8; Hmox1; Gab1; Egln1; Rora; Anxa2; Setd2; Tbx20; Pik3cb; Dag1; Pgk1; Cybb; Flna* | 1,30×10⁻³** | 1,957 | **↓** |
| **Negative regulation of organelle organization** | *Arfgef1; Zfp451; Trip12; Camsap2; Avil; Lif; Smcr8; Tom1l2; Top2a; Pecam1; Hist1h1d; Map1b; Rgcc; Lrrk2; Clec16a; Mpv17l; Rps6ka2; Dusp1; Dcp2; Dnmt3b; Ttbk2; Bub1; Cenpe; Hgf; Ppargc1a; Kdm5a; Kdm3a; Swap70; Ccp110; Plk1; Bnip3; Tnks; Map4; Dync1li1; Chek1; Atm; Tmod3; Phf8* | 1,30×10⁻³** | 2,109 | **↓** |
| **Muscle cell proliferation** | *Cflar; Ptgs2; Gja1; Tnfaip3; Mdm2; Ccl5; Stat3; Ern1; Prkca; Hif1a; Tert; Trib1; Ptk2; Adamts1; Cdkn1a; Vegfa; Gnaq; Traf6; Mmp9; Calcrl; Il6; Rbpj; Ppargc1a; Hmox1; Tbx20* | 2,77×10⁻³** | 2,420 | **↓** |
| **Positive regulation of kinase activity** | *Dstyk; Kif14; Fzd5; Ranbp2; Hmga2; Camkk1; Spag9; Ccl5; Ern1; Akap6; Pik3cg; Map4k5; F2r; Rgcc; Lrrk2; Ptk2; Ccnt1; Map3k13; Dlg1; Cdkn1a; Vegfa; Cd74; Il1rn; Dab2ip; Traf6; Il1b; Vav3; Cenpe; Ect2; Rapgef2; Magi3; Tnfsf15; Hgf; Mob1b; Tlr6; Flt1; Ccnd2; Arrb1; Iqgap1; Lat; Adam8; Nek1; Gab1; Dag1* | 3,14×10⁻³** | 1,868 | **↓** |
| **Protein dealkylation** | *Jmjd1c; Kdm6b; Kdm2a; Kdm5a; Kdm7a; Kdm3a; Kdm6a; Phf8* | 3,14×10⁻³** | 5,727 | **↓** |
| **NADH dehydrogenase complex assembly** | *Ndufs7; Ndufb10; Ndufs8; Ndufa8; Ndufc1; Ndufb6; Ndufs5; Ndufb2; Ndufa5; Ndufa3; Ndufab1; Ndufb7; Ndufa13; Ndufaf3; Ndufa1* | 4,00×10⁻⁹*** | 10,263 | ↑ |
| **Nucleoside triphosphate metabolic process** | *Atp5d; Ndufa12; Eno3; Uqcr10; Atp5h; Ndufs6; Dnajc15; Tspo; Atp5o; Ndufv3; Nme4; Uqcc2; Ndufv2; Bad; Ndufs8; Ak8; Ndufa8; Atp5g3; Atp5e; Ndufb6; Atpif1; Cox6a1; Atp5j2; Dctpp1; Cox4i1; Hspa8; Atp5l; ND2; COX2; ND4; ND4L; ND5; CYTB* | 1,30×10⁻⁷*** | 3,512 | ↑ |
| **Generation of metabolites and energy** | *Sdhaf4; Ndufs7; Ndufa12; Uqcr11; Bloc1s1; Eno3; Uqcr10; Ndufs6; Ndufaf2; Dnajc15; Cox6c; Atp5o; Ndufv3; Uqcc2; Ndufv2; Tcf7l2; Ndufs8; Cox8a; Gnas; Ndufa8; Sdhb; Ndufb6; Cox6a1; Ndufa4; Ndufa5; Etfb; Phkg2; Bax; Idh2; Cox4i1; Cyba; Slc37a2; Fdx1; ND1; ND2; COX2; ND4; ND4L; ND5; CYTB* | 2,20×10⁻⁷*** | 2,955 | ↑ |
| **Nucleoside monophosphate metabolic process** | *Atp5d; Ndufa12; Eno3; Uqcr10; Atp5h; Tk1; Ndufs6; Dnajc15; Tspo; Atp5o; Ndufv3; Uqcc2; Ndufv2; Bad; Ndufs8; Ak8; Ndufa8; Atp5g3; Atp5e; Ndufb6; Atpif1; Cox6a1; Atp5j2; Cox4i1; Hspa8; Atp5l; ND2; COX2; ND4; ND4L; ND5; CYTB* | 6,00×10⁻⁷*** | 3,296 | ↑ |
| **Mitochondrion organization** | *Sdhaf4; Ndufs7; Timm13; Uqcr10; Apopt1; Higd2a; Ndufs6; Dnajc15; Tspo; Ndufb10; Uqcc2; Bad; Fas; Ndufs8; Prdx3; Map1lc3a; Ndufa8; Ndufc1; Atp13a2; Ndufb6; Cdkn2a; Ndufs5; Atpif1; Chchd2; Cox19; Ndufb2; Ndufa5; Htra2; Ndufa3; Cebpa; Coa4; Sdhaf1; Bax; Ndufab1; Ndufb7; Ndufa13; Ndufaf3; Timm17b; Ndufa1* | 9,08×10⁻⁶*** | 2,582 | ↑ |
| **Ribose phosphate metabolic process** | *Atp5d; Ndufa12; Eno3; Uqcr10; Atp5h; Gmpr; Ndufs6; Dnajc15; Tspo; Atp5o; Ndufv3; Nme4; Uqcc2; Ndufv2; Bad; Ndufs8; Ndufa8; Atp5g3; Atp5e; Ndufb6; Atpif1; Cox6a1; Atp5j2; Taldo1; Pgls; Cox4i1; Mvd; Hspa8; Atp5l; ND2; COX2; ND4; ND4L; ND5; CYTB* | 7,20×10⁻⁴*** | 2,270 | ↑ |
| **Purine metabolism** | *Atp5d; Ndufa12; Gamt; Eno3; Uqcr10; Atp5h; Gmpr; Ndufs6; Dnajc15; Tspo; Atp5o; Ndufv3; Nme4; Uqcc2; Ndufv2; Bad; Macrod1; Ndufs8; Ndufa8; Atp5g3; Atp5e; Ndufb6; Atpif1; Cox6a1; Atp5j2; Cox4i1; Mri1; Mvd; Hspa8; Atp5l; ND2; COX2; ND4; ND4L; ND5; CYTB* | 1,52×10⁻³** | 2,151 | ↑ |
| **Mitochondrial gene expression** | *Mrps7; Mrps24; Mrpl52; Mrps16; Mrps6; Mrps34; Mrpl2; Uqcc2; Mrpl16; Mrps15; Mrps35; Mrpl23; Mpv17l2* | 3,06×10⁻³** | 3,851 | ↑ |
| **Ribonucleoprotein complex biogenesis** | *Mrps9; Rps15; Nhp2; Rpl38; Mrps7; Luc7l3; Nol12; Tsr3; Snrpc; Lsm2; Rps10; Snrpd1; Wdr55; Rpl12; Rpl35; Eri3; Mrpl20; Cdkn2a; Pop5; Gtf3a; Rps19; Exosc5; Pih1d1; Gemin7; Eif3k; Rps17; Exosc6; Mpv17l2; Imp3; Rps27l* | 7,52×10⁻³** | 2,129 | ↑ |
| **Dendritic cell differentiation** | *Batf3; Batf; Trem2; Spi1; Cebpb; Tmem176a; Tmem176b* | 3,07×10⁻²* | 5,029 | ↑ |

Abbreviations: Aacg5, Alpha 1-Antitrypsin; Adam8, Arachidonate 15-Lipoxygenase; Adamts1, Adam Metallopeptidase with Thrombospondin Type 1 Motif 1; Agfg1, Activating Signal Cointegrator 1 Complex Subunit 1; Akap6, A-Kinase Anchoring Protein 6; Alkbh5, AlkB Family Member 5; Anxa2, Annexin A2; Apaf1, Apoptotic Protease Activating Factor 1; Atm, Ataxia-Telangiectasia Mutated; Atp5d, ATP Synthase, H+ Transporting, Mitochondrial F1 Complex, Delta Subunit; Atp5e, ATP Synthase, H+ Transporting, Mitochondrial F1 Complex, E Subunit; Atp5g3, ATP Synthase, H+ Transporting, Mitochondrial F1 Complex, Gamma 3 Subunit; Atp5h, ATP Synthase, H+ Transporting, Mitochondrial F1 Complex, H Subunit; Atp5j2, ATP Synthase, H+ Transporting, Mitochondrial F1 Complex, J2 Subunit; Atp5l, ATP Synthase, H+ Transporting, Mitochondrial F1 Complex, L Subunit; Atpif1, ATPase Inhibitory Factor 1; Bad, BCL2-Associated Agonist of Cell Death; Bax, BCL2-Associated X Protein; Bcl2, BCL2 Apoptosis Regulator; Bcl6, BCL6 Transcription Repressor; Bnip3, BCL2 Interacting Protein 3; Calcrl, Calcitonin Receptor-Like Receptor; Camsap2, Calmodulin Regulated Spectrin-Associated Protein 2; Ccnd2, Cyclin D2; Ccnl2, Cyclin L2; Ccl5, C-C Motif Chemokine Ligand 5; Cebpa, CCAAT Enhancer Binding Protein Alpha; Cenpe, Centromere Protein E; Cflar, CASP8 and FADD-Like Apoptosis Regulator; Chd5, Chromodomain Helicase DNA Binding Protein 5; Chek1, Checkpoint Kinase 1; Clu, Clusterin; Cntn2, Contactin 2; Csf3, Colony Stimulating Factor 3; Cxcl10, C-X-C Motif Chemokine Ligand 10; Dab2ip, Disabled Homolog 2 Interacting Protein; Dapk1, Death-Associated Protein Kinase 1; Ddx58, DEAD-Box Helicase 58; Dennd1b, DENN Domain Containing 1B; Dlg1, DLG1 Scaffold Protein; Dnmt3b, DNA (Cytosine-5-) Methyltransferase 3 Beta; Dnmt3a, DNA Methyltransferase 3 Alpha; Dnmt1, DNA (Cytosine-5-) Methyltransferase 1; Dtx3l, Deltex 3 Like; Ect2, Epithelial Cell Transforming Sequence 2; Eid1, Epstein-Barr Virus-Induced 1; Egln1, EGL Nine-Related 1; Epm2a, Epimorphic 2A; Ern1, Endoribonuclease 1; Etfb, Electron Transport Chain FAD Dehydrogenase; Exosc5, Exosome Component 5; Faf1, Fas-Associated Factor 1; Fas, Fas Cell Surface Death Receptor; F2r, Coagulation Factor II (Thrombin) Receptor; F7, Coagulation Factor VII; F9, Coagulation Factor IX; Fad1, Fatty Acid Desaturase 1; Fancd2, Fanconi Anemia Complementation Group D2; Flt1, Fms Related Tyrosine Kinase 1; Foxo1, Forkhead Box O1; Foxo3, Forkhead Box O3; Fosl2, Fos-Like Antigen 2; Fpp2r1, Fibroblast Growth Factor Receptor 2; Gja1, Gap Junction Protein Alpha 1; Gnaq, G-Alpha Q; Gab1, GRB2-Associated Binding Protein 1; Gbp2, Guanylate Binding Protein 2; Ghr, Growth Hormone Receptor; Hmga2, High Mobility Group AT-Hook 2; Hif1a, Hypoxia-Inducible Factor 1 Alpha Subunit; Hif3a, Hypoxia-Inducible Factor 3 Alpha Subunit; Hk2, Hexokinase 2; Hspa8, Heat Shock Protein Family A (Hsp70) Member 8; Htra2, High Temperature Requirement A2; Htr2b, 5-Hydroxytryptamine Receptor 2B; Idb2, Inhibitor of Differentiation 2; Irs2, Insulin Receptor Substrate 2; Il1b, Interleukin 1 Beta; Il1r1, Interleukin 1 Receptor Type 1; Il1rn, Interleukin 1 Receptor Antagonist; Il18, Interleukin 18; Il7r, Interleukin 7 Receptor; Il6, Interleukin 6; Itch, Itchy E3 Ubiquitin Protein Ligase; Itpr1, Inositol 1,4,5-Trisphosphate Receptor Type 1; Jmjd1c, Jumonji Domain Containing 1C; Kdm2a, Lysine Demethylase 2A; Kdm3a, Lysine Demethylase 3A; Kdm4b, Lysine Demethylase 4B; Kdm5a, Lysine Demethylase 5A; Kdm6b, Lysine Demethylase 6B; Kdm7a, Lysine Demethylase 7A; Lif, Leukemia Inhibitory Factor; Map3k13, Mitogen-Activated Protein Kinase Kinase Kinase 13; Mdm2, MDM2 Proto-Oncogene; Mdm4, MDM4 Proto-Oncogene; Mmp12, Matrix Metallopeptidase 12; Mmp9, Matrix Metallopeptidase 9; Ndrg1, N-Myc Downstream-Regulated Gene 1; Ndufa1, NADH:Ubiquinone Oxidoreductase Subunit A1; Ndufb6, NADH:Ubiquinone Oxidoreductase Subunit B6; Nlrp3, NLR Family Pyrin Domain Containing 3; Nos1, Nitric Oxide Synthase 1; Nos2, Nitric Oxide Synthase 2; Nox4, NADPH Oxidase 4; Nrf2, Nuclear Factor Erythroid 2-Related Factor 2; P21, Cyclin-Dependent Kinase Inhibitor 1; P27, Cyclin-Dependent Kinase Inhibitor 1B; P53, Tumor Protein P53; Pgk1, Phosphoglycerate Kinase 1; Pim2, Pim-2 Proto-Oncogene; Ppargc1a, Peroxisome Proliferator-Activated Receptor Gamma Coactivator 1 Alpha; Ptgs2, Prostaglandin-Endoperoxide Synthase 2; Ptk2, Protein Tyrosine Kinase 2; Pten, Phosphatase and Tensin Homolog; Ptcra, Pre-T-Cell Receptor Alpha; Rbpj, Recombination Signal Binding Protein for Immunoglobulin Kappa J Region; Rif1, Rap1 Interacting Factor 1; Rnf19a, Ring Finger Protein 19A; Rora, Retinoic Acid Receptor-Related Orphan Receptor Alpha; Rps6ka2, Ribosomal Protein S6 Kinase Alpha 2; Setd7, SET Domain Containing 7; Socs4, Suppressor of Cytokine Signaling 4; Spag9, Sperm Associated Antigen 9; Stat3, Signal Transducer and Activator of Transcription 3; Stat5, Signal Transducer and Activator of Transcription 5; Tnfaip3, TNF Alpha-Induced Protein 3; Traf3, TNF Receptor Associated Factor 3; Tlr4, Toll-Like Receptor 4; Tnfsf13b, Tumor Necrosis Factor Superfamily Member 13B; Tnfsf15, Tumor Necrosis Factor Superfamily Member 15; Tnfrsf1b, TNF Receptor Superfamily Member 1B; Vegfa, Vascular Endothelial Growth Factor A; Vps13c, VPS13C, ATG16L1-like; Zfp451, Zinc Finger Protein. ***: FDR < 0.001; **: 0.001 ≤ FDR < 0.01; *: 0.01 ≤ FDR < 0.05.

Table S3: Pathway enrichment analysis of differentially expressed genes in BV2 microglial cells following subchronic exposure to clozapine versus vehicle.

| **GENE FUNCTIONS** | **DEGS** | **FDR** | **ENRICHMENT RATIO** | **EXPRESSION** |
| --- | --- | --- | --- | --- |
| **Response to oxygen levels** | *Cflar; Ptgs2; Foxo3; Ddit4; Apaf1; Mdm2; Alkbh5; Nos2; Brip1; Bnip3l; Nampt; Hif1a; Ero1l; Ep300; Ndrg1; Atp6v1a; Vegfa; Smad4; Pten; Pdk1; Foxo1; Arnt; Slc2a1; Fosl2; Rbpj; Rest; Nos1; Atp6v0a2; Tbl2; Ppargc1a; Flt1; Hilpda; Itpr1; Hk2; Adm; Eef2k; Hif3a; Bnip3; Adam8; F7; Egln1; Mmp12; Ireb2; Rora; Cbl; Atm; Higd1a; Pgk1; Cybb* | 8,20×10⁻⁵*** | 2,221 | **↓** |
| **Positive regulation of catabolic process** | *Sh3bp4; Rc3h1; Hecw2; Epm2a; Gja1; Tnfaip3; Mdm2; Smcr8; Sumo2; Bnip3l; Hif1a; Entpd5; Arel1; Atxn3; Lpcat1; Socs4; Trib1; Lrrk2; Rnf19a; Ago2; Clec16a; Cblb; Dtx3l; Crebrf; Csnk1a1; Smad7; Pten; Dab2ip; Itch; Il1b; Foxo1; Tiparp; Faf1; Ripk2; Prkaa2; Tnfrsf1b; Ankib1; Cnot6l; Zfand2a; Hk2; Ctsc; Plk1; Trim30a; Bnip3; Adam8; Irs2; Cnot1; Vps13c; Tlr9; Sorl1; Atm; Arih1; Pias1; Pim2; Mid2* | 1,55×10⁻⁴*** | 2,026 | **↓** |
| **Stress-activated protein kinase signaling cascade** | *Fzd5; Stk10; Per1; Spag9; Pafah1b1; Ern1; Map4k5; Ccdc88c; Syk; Rap2a; Trib1; Irak4; Dvl3; Dlg1; Pak2; Dusp1; Vegfa; Map4k3; Il1rn; Rapgef1; Dab2ip; Traf6; Itch; Zeb2; Hipk3; Il1b; Foxo1; Magi3; Fktn; Tlr4; Errfi1; Ripk2; Hgf; Tlr6; Nr2c2; Hipk2; Nek1; Sh3rf1; Gab1; Tlr9; Tirap; Oxsr1* | 2,43×10⁻⁴*** | 2,214 | **↓** |
| **Covalent chromatin modification** | *Elk4; Zfp451; Trip12; Eya4; Hmga2; Per1; Jade2; Usp22; Kdm6b; Prkca; Asxl2; Arid4a; Ncoa1; Hdac9; Atxn3; Kat6b; Ep300; Lrrk2; Nipbl; Bcl6; Dtx3l; Chd1; Kdm4b; Phf10; Vegfa; Smad4; Jak2; Kdm2a; Rif1; Eid1; Dnmt3b; Gtf3c4; Jade1; Setd7; Tet2; Padi2; Chd5; Prkaa2; Rlf; Rest; Pcgf3; Nos1; Clock; Kdm5a; Kdm7a; Kdm3a; Rybp; Arrb1; Msl2; Setd2; Chek1; Atm; Kdm6a; Tbl1x; Phf8; Kdm5c; Hcfc1* | 4,78×10⁻⁴*** | 1,881 | **↓** |
| **Regulation of protein catabolic process** | *Hecw2; Gja1; Tnfaip3; Mdm2; Nos2; Sumo2; Odc1; Ubxn2a; Arel1; Atxn3; Lpcat1; Styx; Socs4; Trib1; Lrrk2; Rnf19a; Azin1; Clec16a; Cblb; Usp25; Crebrf; Csnk1a1; Smad7; Smad4; Pten; Dab2ip; March7; Itch; Il1b; Foxo1; Tiparp; Faf1; Tnfrsf1b; Ankib1; Zfand2a; Hipk2; Rybp; Ctsc; Arntl; Plk1; Furin; Trim30a; Adam8; Egln1; Smarcc1; Sorl1; Arih1; Pias1; Flna* | 4,78×10⁻⁴*** | 1,986 | **↓** |
| **Regulation of DNA-binding transcription factor activity** | *Il18rap; Cflar; Tnfaip3; Hmga2; Nlrp3; Trim25; Csf3; Med13; Stat3; Traf3; Syk; Ptch1; Jmy; Acod1; Trib1; Ep300; Irak4; Pim1; Vegfa; Nlrc4; Smad7; Ppargc1b; Jak2; Pten; Dab2ip; Traf6; Itch; Camk1d; Il1b; Tlr4; Faf1; Id3; Ripk2; Ddx58; Klf4; Ppargc1a; Tlr6; Clock; Bhlhe40; Fancd2; Kdm5a; Mtpn; Hipk2; Arrb1; Adam8; Egln1; Tlr9; Tirap; Mid2; Flna* | 4,94×10⁻⁴*** | 1,956 | **↓** |
| **Regulation of GTPase activity** | *Agfg1; Sh3bp4; Dennd1b; Plxna2; Arfgef1; Srgap2; Rabgap1l; Chml; Ranbp2; Tbc1d15; Rapgef6; Ccl7; Acap1; Pafah1b1; Ccl5; Snx13; Dock4; Eif5; Net1; Sema4d; F2r; Lrrk2; Nckap1l; Dvl3; Cblb; Bcl6; Tbc1d5; Rin1; Gnaq; Dock8; Usp6nl; Rapgef1; Dab2ip; Rin2; Arhgap21; Arhgap11a; Iqgap3; Vav3; Depdc1a; Rapgef2; Depdc5; Plxna1; Wnk1; Arrb1; Dock1; Arhgap35; Iqgap1; Tbc1d9; Elmod2; Myo9a; Rasa2; Dock11; Tbc1d8b* | 6,47×10⁻⁴*** | 1,885 | **↓** |
| **Immune response-regulating signaling pathway** | *Cd28; Dennd1b; Rc3h1; Slc39a10; Tnfaip3; Cd300lf; Traf3; Rsad2; Syk; Mef2c; Elf1; Acod1; Nckap1l; Cblb; Pdpk1; Ticam2; Rapgef1; Dab2ip; Traf6; Plcg1; Ptprj; Vav3; Tlr4; Pde4b; Ripk2; Ddx58; Tlr6; Tec; Usp46; Ankrd17; Usp12; Braf; Wnk1; Clec4e; Trim30a; Irf7; Otud4; Bcar1; Tlr9; Tirap; Usp9x; Tlr13; Rps6ka3* | 7,98×10⁻⁴*** | 2,018 | **↓** |
| **Negative regulation of intracellular signal transduction** | *Sh3bp4; Ptgs2; Rnf149; Epm2a; Tnfaip3; Ddit4; Mdm2; Dyrk2; Hmga2; Fbxw11; Nlrp3; Per1; Pafah1b1; Prkca; G2e3; Hif1a; Arrdc3; Deptor; Lrrk2; Rrm2b; Dlg1; Bcl6; Parp14; Dusp1; Smad4; Pten; Rapgef1; Dab2ip; March7; Tmem127; Itch; Mmp9; Scai; Ptprj; Hipk3; Il1b; Cpne1; Foxo1; Trim59; Fktn; Tlr4; Pde4b; Errfi1; Klf4; Prkaa2; Depdc5; Itpr1; Dusp16; Arrb1; Arntl; Arhgap35; Dusp4; Egln1; Rora; Sorl1; Sik2; Atm; Rasa2; Dag1; Ddx3x* | 8,53×10⁻⁴*** | 1,774 | **↓** |
| **Regulation of protein serine/threonine kinase activity** | *Fzd5; Tnfaip3; Hmga2; Spag9; Cdk12; Ern1; Prkca; Akap6; Pik3cg; Map4k5; Syk; F2r; Trib1; Lrrk2; Ccnt1; Dvl3; Cdkn1a; Dusp1; Vegfa; Map4k3; Jak2; Il1rn; Dab2ip; Traf6; Zeb2; Ptprj; Hipk3; Il1b; Iqgap3; Rapgef2; Magi3; Ccne2; Tlr4; Ripk2; Hgf; Ccng2; Tlr6; Flt1; Braf; Wnk1; Ccnd2; Dusp16; Arrb1; Plk1; Iqgap1; Adam8; Dusp4; Gab1; Tlr9; Tirap; Sorl1; Higd1a; Ddx3x* | 1,28×10⁻³** | 1,819 | **↓** |
| **Mitochondrion organization** | *Ndufb3; Sdhaf4; Ndufa10; Ndufs7; Fbxo7; Timm13; Timm22; Sept4; Phb; Mtfp1; Uqcr10; Tmem11; Coa3; Immp2l; Apopt1; Siva1; Timm9; Higd2a; Ndufs6; Dnajc15; Tspo; Cox14; Cox17; Alkbh7; Ndufb10; Uqcc2; Ndufa2; Bad; Ndufs8; Uqcc3; Fxn; Ndufaf5; Map1lc3a; Romo1; Ndufa8; Ndufb5; Jtb; Ndufc1; Ndufaf6; Ndufb6; Cdkn2a; Ndufs5; Atpif1; Sfn; Park7; Smim20; Fis1; Cdk5; Chchd2; Cox19; Ndufb2; Ndufa5; Htra2; Ndufa9; Ndufa3; Bbc3; Cebpa; Ndufc2; Coa4; Tomm40; Bax; Coq7; Ndufab1; Ndufb7; Dctn6; Slc25a4; Ndufa13; Ndufaf3; Wdr45; Timm17b; Ndufb11; Ndufa1* | 1,00×10⁻²⁶*** | 2,985 | **↑** |
| **NADH dehydrogenase complex assembly** | *Ndufb3; Ndufa10; Ndufs7; Ndufb10; Ndufa2; Ndufs8; Ndufaf5; Ndufa8; Ndufb5; Ndufc1; Ndufaf6; Ndufb6; Ndufs5; Ndufb2; Ndufa5; Ndufa9; Ndufa3; Ndufc2; Ndufab1; Ndufb7; Ndufa13; Ndufaf3; Ndufb11; Ndufa1* | 1,00×10⁻²⁶*** | 10,282 | **↑** |
| **Ribonucleoprotein complex biogenesis** | *Mrps9; Aamp; Snrpe; Snrpd3; Rps15; Rpf2; Rrp1; Nhp2; Rpl26; Rpl38; Mrps7; Rpl23a; Aatf; Znhit3; Luc7l3; Rps23; Rps24; Nufip1; Exosc4; Nol12; Rpl35a; Gtf2h5; Rps2; Tsr3; Wdr46; Lsm2; Gemin6; Rps10; Rrp36; Snrpd1; Wdr55; Rbfa; Trmt112; Wdr74; Npm3; Rpl12; Rpl35; LOC105244208; Mrpl20; Exosc3; Cdkn2a; Rpl11; Mrto4; Pop5; Rpl6; Denr; Gtf3a; Snrpg; Lsm3; Rps19; Exosc5; Fbl; Pih1d1; Gemin7; Eif3k; Pop4; Rpl13a; Rps17; Lsm4; Exosc6; Mpv17l2; Ppan; Imp3; Rps27l; Rrp9; Rpl14* | 4,81×10⁻¹³*** | 2,932 | **↑** |
| **Nucleoside triphosphate metabolic process** | *Ndufa10; Sdhc; Atp5d; Eno3; Uqcr10; Tefm; Nme1; Atp5g1; Atp5h; Ndufs6; Dnajc15; Tspo; Atp5j; Atp5o; Ndufv3; Ndufa7; Uqcc2; Bad; Ndufs8; Uqcc3; Fxn; Ndufa8; Atp5g3; Atp5e; Atp5f1; Ak2; Gale; Ndufb6; Atpif1; Park7; Khk; Dnajc30; Cox6a1; Atp5j2; Ndufc2; Coq7; Dctpp1; Cox6a2; Cox4i1; Hspa8; Atp5l; ND2; COX2; ND4; ND4L; ND5; CYTB* | 4,18×10⁻¹⁰*** | 3,132 | **↑** |
| **Nucleoside monophosphate metabolic process** | *Ndufa10; Sdhc; Atp5d; Eno3; Uqcr10; Tefm; Atp5g1; Atp5h; Tk1; Ndufs6; Dnajc15; Tspo; Atp5j; Atp5o; Ndufv3; Ndufa7; Uqcc2; Bad; Ndufs8; Uqcc3; Fxn; Ndufa8; Atp5g3; Atp5e; Atp5f1; Ak2; Gale; Ndufb6; Atpif1; Park7; Khk; Nudt9; Dnajc30; Cox6a1; Atp5j2; Ndufc2; Coq7; Cox6a2; Cox4i1; Hspa8; Atp5l; ND2; COX2; ND4; ND4L; ND5; CYTB* | 1,12×10⁻⁹*** | 3,031 | **↑** |
| **Generation of metabolites and energy** | *Ndufb3; Glrx2; Sdhaf4; Ndufa10; Sdhc; Ndufs7; Uqcr11; Bloc1s1; Eno3; Uqcr10; Mdh1; Tefm; Immp2l; Glrx5; Ndufs6; Ndufaf2; Dnajc15; Cox6c; Cox17; Atp5o; Ndufv3; Ndufa7; Uqcc2; Ndufs8; Cox8a; Uqcc3; Fxn; Gnas; Ndufa8; Gale; Sdhb; Ndufb6; Park7; Khk; Dnajc30; Cox6a1; Ndufa4; Ndufa5; Etfb; Ndufc2; Phkg2; Bax; Idh2; Coq7; Cox6a2; Cox4i1; Cyba; Fdx1; ND1; ND2; COX2; ND4; ND4L; ND5; CYTB* | 1,79×10⁻⁸*** | 2,544 | **↑** |
| **Ribose phosphate metabolic process** | *Mpc2; Ndufa10; Sdhc; Atp5d; Hint1; Eno3; Uqcr10; Tefm; Nme1; Atp5g1; Atp5h; Gmpr; Ndufs6; Dnajc15; Tspo; Atp5j; Atp5o; Ndufv3; Ndufa7; Uqcc2; Bad; Ndufs8; Uqcc3; Fxn; Ndufa8; Atp5g3; Atp5e; Atp5f1; Ak2; Gale; Ndufb6; Atpif1; Park7; Khk; Nudt9; Dnajc30; Cox6a1; Atp5j2; Mcee; Ndufc2; Taldo1; Sult2b1; Coq7; Cox6a2; Pgls; Mlycd; Cox4i1; Mvd; Hspa8; Atp5l; ND2; COX2; ND4; ND4L; ND5; CYTB* | 7,11×10⁻⁷*** | 2,275 | **↑** |
| **Purine metabolism** | *Mpc2; Ndufa10; Sdhc; Atp5d; Gamt; Hint1; Eno3; Uqcr10; Tefm; Nme1; Atp5g1; Atp5h; Gmpr; Ndufs6; Dnajc15; Tspo; Atp5j; Atp5o; Ndufv3; Ndufa7; Oard1; Uqcc2; Bad; Macrod1; Ndufs8; Uqcc3; Fxn; Ndufa8; Atp5g3; Atp5e; Atp5f1; Ak2; Gale; Ndufb6; Atpif1; Park7; Khk; Nudt9; Dnajc30; Cox6a1; Atp5j2; Mcee; Ndufc2; Sult2b1; Coq7; Cox6a2; Mlycd; Cox4i1; Mri1; Mvd; Hspa8; Atp5l; ND2; COX2; ND4; ND4L; ND5; CYTB* | 1,88×10⁻⁶*** | 2,170 | **↑** |
| **Mitochondrial gene expression** | *Mrps7; Mrpl12; Mrps24; Tefm; Coa3; Chchd1; Mrpl52; Mrps6; Mrps34; Ndufa7; Mrpl2; Uqcc2; Mrpl16; Mrpl47; Mrps21; Mrps15; Mrps17; Mrps35; Mrps25; Mrpl23; Mpv17l2* | 5,46×10⁻⁶*** | 3,896 | **↑** |
| **Ribonucleoprotein complex subunit organization** | *Snrpe; Snrpd3; Rps15; Rpf2; Rpl38; Mrps7; Rpl23a; Znhit3; Luc7l3; Rps23; Pelo; Nufip1; Rps2; Lsm2; Gemin6; Rps10; Snrpd1; Rpl12; Mrpl20; Rpl11; Mrto4; Rpl6; Denr; Snrpg; Lsm3; Rps19; Pih1d1; Gemin7; Eif3k; Rpl13a; Lsm4; Mpv17l2; Ppan; Rps27l* | 6,12×10⁻⁶*** | 2,743 | **↑** |

Abbreviations: Adm, Adrenomedullin; Arel1, AREL1 Zinc Finger Protein; Arih1, Ariadne RBR E3 Ubiquitin Protein Ligase 1; Arnt, Aryl Hydrocarbon Receptor Nuclear Translocator; Arrb1, Arrestin Beta 1; Atm, Ataxia Telangiectasia Mutated; Atp5d, ATP Synthase, H+ Transporting, Mitochondrial F1 Complex, Delta Subunit; Atp5g1, ATP Synthase, H+ Transporting, Mitochondrial F1 Complex, Gamma Subunit 1; Atp5h, ATP Synthase, H+ Transporting, Mitochondrial F1 Complex, Subunit H; Atp6v0a2, ATPase, H+ Transporting, Lysosomal V0 Subunit A2; Atp6v1a, ATPase, H+ Transporting, V1 Subunit A; Atpif1, ATPase Inhibitory Factor 1; Bcl6, B-Cell CLL/Lymphoma 6; Bad, BCL2 Associated Agonist of Cell Death; Bax, BCL2-Associated X Protein; Bnip3, BCL2 Interacting Protein 3; Bnip3l, BCL2 Interacting Protein 3 Like; Cbl, Casitas B-Lineage Lymphoma; Cblb, Casitas B-Lineage Lymphoma, Pseudogene B; Ccng2, Cyclin G2; Ccdc88c, Coiled-Coil Domain Containing 88C; Cd28, CD28 Molecule; Cdkn1a, Cyclin-Dependent Kinase Inhibitor 1A; Cebpa, CCAAT Enhancer Binding Protein Alpha; Clec16a, C-type Lectin Domain Family 16 Member A; Cnot1, CCR4-NOT Transcription Complex Subunit 1; Cnot6l, CCR4-NOT Transcription Complex Subunit 6 Like; Ctsc, Cathepsin C; Dab2ip, Disabled 2 Interacting Protein; Ddit4, DNA Damage Inducible Transcript 4; Dnmt3b, DNA (Cytosine-5-)-Methyltransferase 3 Beta; Dtx3l, Deltex 3 Like; Dusp1, Dual Specificity Phosphatase 1; Dusp16, Dual Specificity Phosphatase 16; Egln1, EGLN Prolyl Hydroxylase 1; Eid1, E1A-Interacting Inhibitor Of Differentiation 1; Eif3k, Eukaryotic Translation Initiation Factor 3 Subunit K; Epm2a, Epimerase 2A; Ero1l, ERO1-Like ER Oxidase 1; Faf1, Fas-Associated Factor 1; Fbxw11, F-Box and WD Repeat Domain Containing 11; Fktn, Fukutin; Flt1, Fms Related Tyrosine Kinase 1; Foxo1, Forkhead Box O1; Foxo3, Forkhead Box O3; Fpp2, Fibrillin-2; Ftl1, Ferritin Light Chain 1; Gab1, GRB2-Associated Binding Protein 1; Gja1, Gap Junction Protein Alpha 1; Gnas, GNAS Complex Locus; Hecw2, HECT And WWE Domain Containing E3 Ubiquitin Protein Ligase 2; Hif1a, Hypoxia Inducible Factor 1 Subunit Alpha; Hif3a, Hypoxia Inducible Factor 3 Subunit Alpha; Hmga2, High Mobility Group AT-Hook 2; Hspa8, Heat Shock 70kDa Protein 8; Irak4, Interleukin-1 Receptor-Associated Kinase 4; Itch, Itchy E3 Ubiquitin Protein Ligase; Jak2, Janus Kinase 2; Jmy, JUNB-Interacting Modulator; Kdm3a, Lysine Demethylase 3A; Kdm5a, Lysine Demethylase 5A; Kdm6a, Lysine Demethylase 6A; Kdm7a, Lysine Demethylase 7A; Mdm2, Mouse Double Minute 2 Homolog; Mid2, Mitochondrial Dynamics Regulator; Mmp9, Matrix Metallopeptidase 9; Msl2, Male-Specific Lethal 2; Mtpn, Myotrophin; Mvd, Mevalonate Kinase; Nckap1l, NCK-Associated Protein 1 Like; Ndrg1, N-Myc Downstream Regulated Gene 1; Nek1, NIMA-Related Kinase 1; Nfkbia, NF-kappa-B Inhibitor Alpha; Nfkb2, NF-kappa-B Subunit 2; Nlrc4, NLR Family CARD Domain Containing 4; Nmrk2, Nicotinamide Riboside Kinase 2; Nofl2, Nitric Oxide Synthase-1 (Endothelial); Npm3, Nucleophosmin 3; Nsd1, Nuclear Receptor Coactivator 1; Ntrk3, Neurotrophic Tyrosine Kinase Receptor Type 3; Park7, Parkinson Protein 7; Per1, Period Circadian Regulator 1; Phf8, PHD Finger Protein 8; Pim1, Pim-1 Proto-Oncogene; Pkm2, Pyruvate Kinase M2 Isozyme; Ppargc1a, Peroxisome Proliferator-Activated Receptor Gamma Coactivator 1 Alpha; Pten, Phosphatase And Tensin Homolog; Ptgs2, Prostaglandin-Endoperoxide Synthase 2; Rbpj, Recombination Signal Binding Protein for Immunoglobulin Kappa J Region; Rest, Repressor Element 1 Silencing Transcription Factor; Rora, RAR-Related Orphan Receptor Alpha; Socs4, Suppressor of Cytokine Signaling 4; Syk, Spleen Tyrosine Kinase; Taf1, Transcription Initiation Factor TFIID Subunit 1; Tln2, Talin 2; Tlr9, Toll-Like Receptor 9; Trib1, Tribbles 1; Usp25, Ubiquitin-Specific Protease 25; Usp46, Ubiquitin-Specific Protease 46; Vegfa, Vascular Endothelial Growth Factor A; Wnk1, WNK Lysine Deficient Protein Kinase 1; Zeb2, Zinc Finger E-Box Binding Homeobox 2; Zfand2a, Zinc Finger, AN1-Type Domain Containing 2A. ***: FDR < 0.001; **: 0.001 ≤ FDR < 0.01.

Table S4:.Pathway enrichment analysis of differentially expressed genes in BV2 microglial cells following subchronic exposure to haloperidol versus vehicle.

| **GENE FUNCTIONS** | **DEGS** | **FDR** | **ENRICHMENT RATIO** | **EXPRESSION** |
| --- | --- | --- | --- | --- |
| **Angiogenesis** | *Ptgs2; Itgb2; Ccl2; Epn2; Pecam1; Prkca; Hdac9; Rgcc; Nr4a1; Adamts1; Vegfa; Itgav; Mmp9; Il1b; F3; Ddah1; Ntrk1; Ecm1; S1pr1; Pf4; Cd36; Hk2; Adm; Hif3a; E2f8; Adam8; Klf2; Hmox1; Egln1; Mcam; Anxa2; Tbx20; Pgk1* | 1,49×10⁻⁸*** | 3,903 | **↓** |
| **Leukocyte migration** | *Gpr35; Itgb2; Trpm2; Ccl2; Ccl7; Ccl9; Pecam1; Prkca; Itgb7; Vegfa; Cd74; Il1rn; Fut7; Lbp; Mmp9; Il1b; Ecm1; S1pr1; Padi2; Bst1; Stap1; Pf4; Cxcl2; Adam8; F7; Ccr1* | 1,62×10⁻⁸*** | 4,764 | **↓** |
| **Response to oxygen levels** | *Ptgs2; Ddit4; Nos2; Ccl2; Ero1l; Rgcc; Ndrg1; Fam162a; Vegfa; Pdk1; Ddah1; Slc2a1; Fosl2; Hilpda; Hk2; Adm; Hif3a; Bnip3; Adam8; F7; Hmox1; Egln1; Mmp12; Higd1a; Pgk1* | 9,02×10⁻⁸*** | 4,495 | **↓** |
| **Cell chemotaxis** | *Gpr35; Itgb2; Trpm2; Ccl2; Ccl7; Ccl9; Prkca; Nr4a1; Vegfa; Cd74; Il1rn; Lbp; Il1b; S1pr1; Padi2; Bst1; Stap1; Pf4; Cxcl2; Adam8; F7; Bcar1; Ccr1* | 1,27×10⁻⁷*** | 4,741 | **↓** |
| **Cytokine signaling** | *Il18rap; Gpr35; Arg1; Osm; Ccl2; Ccl7; Ccl9; Cd300lf; Il7r; Csf2rb2; Ebi3; Cd74; Il1rn; Il1b; F3; Ecm1; Padi2; Il6; Stap1; Pf4; Cxcl2; Pirb; Il15; Mmp12; Ccr1* | 5,83×10⁻⁷*** | 4,008 | **↓** |
| **Vascular development** | *Ptgs2; Itgb2; Ccl2; Epn2; Prkca; Hdac9; Rgcc; Adamts1; Vegfa; Mmp9; Il1b; F3; Ddah1; Ntrk1; Ecm1; Pf4; Cd36; Hk2; Adm; Klf2; Hmox1; Egln1; Pgk1* | 6,88×10⁻⁷*** | 4,255 | **↓** |
| **Response to wounding** | *F5; Gja1; Arg1; Ccl2; Plek; Pecam1; Prkca; Myoz1; Celsr1; Cdkn1a; Sulf2; F3; Ntrk1; Id3; Il6; Pf4; Cxcl2; Cd36; Klk8; Adm; Gipr; Zfp36; F7; F10; Hmox1; Mmp12; Mcam; Anxa2; Cd109* | 7,71×10⁻⁷*** | 3,430 | **↓** |
| **Response to bacterial infection** | *Ptgs2; Gja1; Arg1; Nlrp3; Nos2; Ccl2; Prkca; Fos; Trib1; Vim; Il1rn; Itgav; Lbp; Il1b; Il6; Stap1; Pf4; Cxcl2; Cd36; Adm; Zfp36; Junb; Acp5* | 5,77×10⁻⁶*** | 3,739 | **↓** |
| **Regulation of endocytosis** | *Dlg4; Ccl2; Epn2; Prkca; Cd300lf; Arc; Vegfa; Itgav; Lbp; Il1b; Fcgr1; Stap1; Tfr2; Cd36; Lrpap1; Prkcg; Arrb1; Anxa2; Trf* | 1,36×10⁻⁵*** | 4,185 | **↓** |
| **Phagocytosis** | *Rhobtb1; Itgb2; Ccl2; Pecam1; Cd300lf; Itgav; Lbp; Il1b; Tgm2; Fcgr1; Stap1; Cd36; Prkcg; P2ry6; Msr1* | 1,69×10⁻⁵*** | 5,184 | **↓** |

Abbreviations: Adm, Adrenomedullin; Adam8, A Disintegrin And Metalloproteinase Domain Containing Protein 8; Adamts1, A Disintegrin And Metalloproteinase With Thrombospondin Motifs 1; Adamts2, A Disintegrin And Metalloproteinase With Thrombospondin Motifs 2; Anxa2, Annexin A2; Arg1, Arginase 1; Bcar1, Breast Cancer Anti-Estrogen Resistance 1; Bst1, Bone Marrow Stromal Antigen 1; Ccl2, C-C Motif Chemokine Ligand 2; Ccl7, C-C Motif Chemokine Ligand 7; Ccl9, C-C Motif Chemokine Ligand 9; Ccr1, C-C Motif Chemokine Receptor 1; Cd36, CD36 Molecule; Cd74, CD74 Molecule; Cd300lf, CD300 Leukocyte Antigen-Like Factor; Cdkn1a, Cyclin-Dependent Kinase Inhibitor 1A; Celsr1, Cadherin EGF LAG Seven-Pass G-Type Receptor 1; Cxcl2, C-X-C Motif Chemokine Ligand 2; Ddit4, DNA Damage Inducible Transcript 4; Ddah1, Dimethylarginine Dimethylaminohydrolase 1; Dlg4, Discs Large MAGUK Scaffold Protein 4; E2f8, E2F Transcription Factor 8; Ecm1, Extracellular Matrix Protein 1; Egln1, EGLN Prolyl Hydroxylase 1; Epn2, Epsin 2; Ero1l, ERO1-Like ER Oxidase 1; F3, Coagulation Factor III (Thromboplastin); F7, Coagulation Factor VII; F10, Coagulation Factor X; Fam162a, Family With Sequence Similarity 162 Member A; Fcgr1, Fc Gamma Receptor I; Fosl2, Fos Like 2; Gja1, Gap Junction Protein Alpha 1; Gipr, Gastric Inhibitory Polypeptide Receptor; Gpr35, G Protein-Coupled Receptor 35; Hif3a, Hypoxia Inducible Factor 3 Subunit Alpha; Hk2, Hexokinase 2; Hmox1, Heme Oxygenase 1; Hdac9, Histone Deacetylase 9; Hilpda, Hypoxia-Inducible Lipid Droplet-Associated Protein; Id3, Inhibitor of DNA Binding 3; Il1b, Interleukin 1 Beta; Il1rn, Interleukin 1 Receptor Antagonist; Il6, Interleukin 6; Il7r, Interleukin 7 Receptor; Il15, Interleukin 15; Il18rap, Interleukin 18 Receptor Accessory Protein; Itgav, Integrin Subunit Alpha V; Itgb2, Integrin Subunit Beta 2; Itgb7, Integrin Subunit Beta 7; Junb, JunB Proto-Oncogene; Klf2, Kruppel Like Factor 2; Klk8, Kallikrein-Related Peptidase 8; Lbp, Lipopolysaccharide Binding Protein; Lrpap1, Low Density Lipoprotein Receptor-Related Protein Associated Protein 1; Mcam, Melanoma Cell Adhesion Molecule; Mmp9, Matrix Metallopeptidase 9; Mmp12, Matrix Metallopeptidase 12; Msr1, Macrophage Scavenger Receptor 1; Ndrg1, N-Myc Downstream Regulated Gene 1; Nos2, Nitric Oxide Synthase 2; Ntrk1, Neurotrophic Receptor Tyrosine Kinase 1; Nr4a1, Nuclear Receptor Subfamily 4 Group A Member 1; Osm, Oncostatin M; Padi2, Peptidyl Arginine Deiminase 2; Pecam1, Platelet Endothelial Cell Adhesion Molecule 1; Pf4, Platelet Factor 4; Pgk1, Phosphoglycerate Kinase 1; Pirb, Immunoglobulin Superfamily Containing Leucine-Rich Repeat Protein 1; Plek, PLEK Striatin Family Member; P2ry6, Purinergic Receptor P2Y6; Prkca, Protein Kinase C Alpha; Prkcg, Protein Kinase C Gamma; Ptgs2, Prostaglandin-Endoperoxide Synthase 2 (COX-2); Rhobtb1, Rho-Related BTB Domain Containing 1; S1pr1, Sphingosine-1-Phosphate Receptor 1; Slc2a1, Solute Carrier Family 2 Member 1; Stap1, STAM-Binding Protein 1; Tbx20, T-Box Transcription Factor 20; Tfr2, Transferrin Receptor 2; Trf, Transferrin; Trib1, Tribbles 1; Trpm2, Transient Receptor Potential Cation Channel Subfamily M Member 2; Vim, Vimentin; Wnk1, WNK Lysine Deficient Protein Kinase 1; Zfp36, Zinc Finger Protein 36. ***: FDR < 0.001.
